# Supplementary material for: Engineering sulphur vacancy in VS2 as high performing zinc-ion batteries with high cyclic stability
Source: Royal Society of Chemistry journal article supplement (doi:10.1039/d0nj02917c), 2020-01-01
Supplement: d0nj02917c1.pdf [file d0nj02917c1.pdf]

# Engineering Sulphur Vacancy in VS<sub>2</sub> as High Performing Zinc-ion Battery with High Cyclic Stability

Bo-Si Yin,<sup>1,2</sup> Si-Wen Zhang,<sup>1,2</sup> Ting Xiong,<sup>3</sup> Wen Shi,<sup>3</sup> Ke Ke,<sup>1</sup> Wee Siang Vincent Lee,<sup>3,\*</sup> Junmin Xue,<sup>3,\*</sup> Zhen-Bo Wang<sup>1,2\*</sup>

1. MIIT Key Laboratory of Critical Materials Technology for New Energy Conversion and Storage, School of Chemistry and Chemical Engineering, Harbin Institute of Technology, No.92 West-Da Zhi Street, Harbin, 150001 China

2 State Key Lab of Urban Water Resource and Environment, Harbin Institute of Technology, No.92 West-Da Zhi Street, Harbin, 150001 China

3 Department of Materials Science and Engineering, National University of Singapore, 117576, Singapore, Singapore

\* Corresponding author.

Email: [wangzhb@hit.edu.cn](mailto:wangzhb@hit.edu.cn) (Z.B. Wang)

Email: [msexuejm@nus.edu.sg](mailto:msexuejm@nus.edu.sg) (J.M. Xue)

Email: [mseleew@nus.edu.sg](mailto:mseleew@nus.edu.sg) (W.S.V. Lee)

## Computational Methods

The calculations were performed using density-functional theory (DFT) with the generalized gradient approximation (GGA) of PBE.<sup>[1]</sup> The projector augmented wave potentials<sup>[2]</sup> were employed as implemented in the vienna ab-initio simulation package (VASP).<sup>[3]</sup> The plane-wave cutoff energy of 450 eV was chosen. The convergence for energy and the Hellmann–Feynman force were chosen as  $1 \times 10^{-6}$  eV and 0.01 eV, respectively. For the structural optimization of layer VS<sub>2</sub>(001) with a  $4 \times 2 \times 1$  supercell containing two S-V-S sandwich layers, the  $3 \times 3 \times 1$  k-points sampling was employed. The spin polarization was considered throughout the calculations. To avoid the periodic interaction, a vacuum thickness of 15 Å for the sulfur vacancy and Zn adsorption studies were built. During the optimization process, the lattice constants for the supercell were fixed and all atoms were allowed to relax until the force on each atom was less than 0.001 eV Å<sup>-1</sup>.

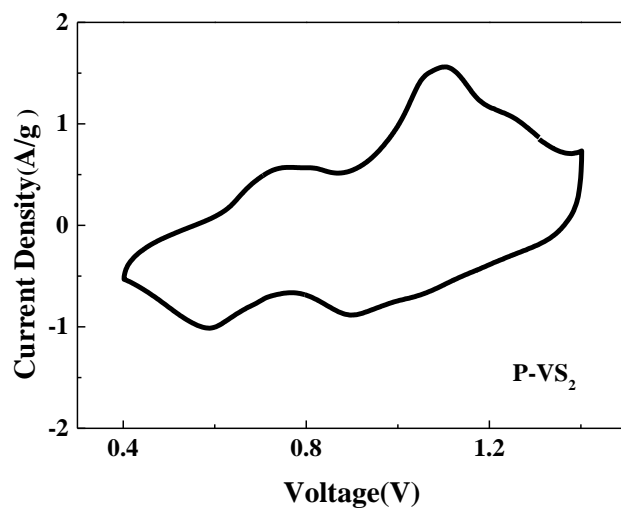

**Figure S1:** CV profile of P-VS<sub>2</sub>

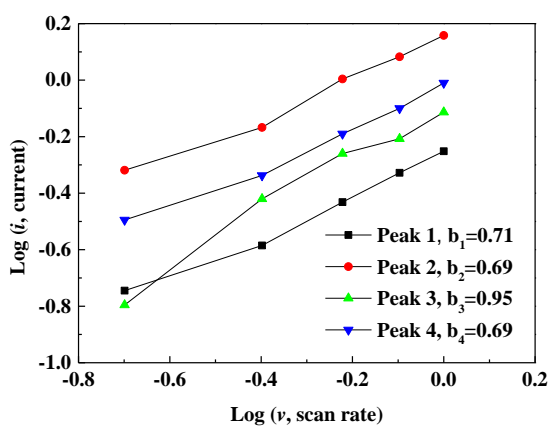

**Figure S2:** The corresponding plots of log (peak current) vs. log (scan rate) at each peak of P-VS<sub>2</sub>

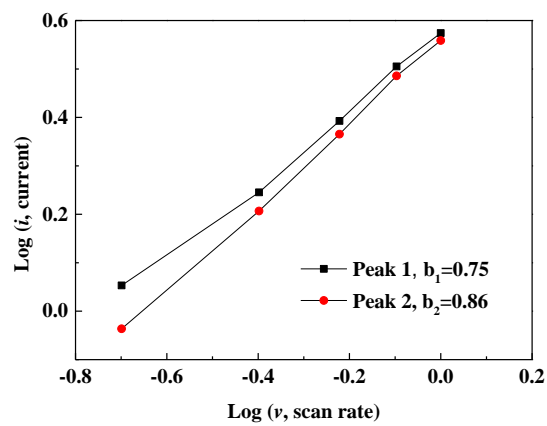

**Figure S3:** The corresponding plots of log (peak current) vs. log (scan rate) at each peak of D-VS<sub>2</sub>

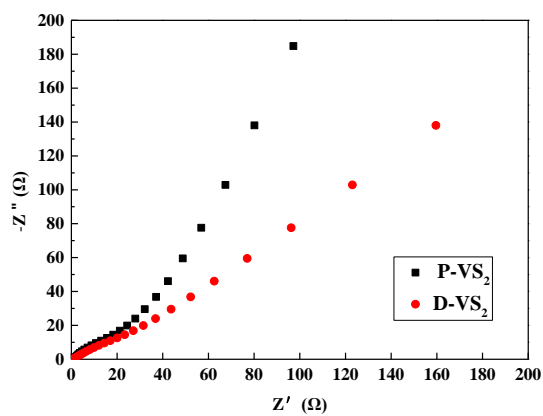

**Figure S4:** The Nyquist curve of the electrochemical impedance measurements (EIS) of P-VS<sub>2</sub> and D-VS<sub>2</sub> electrode.

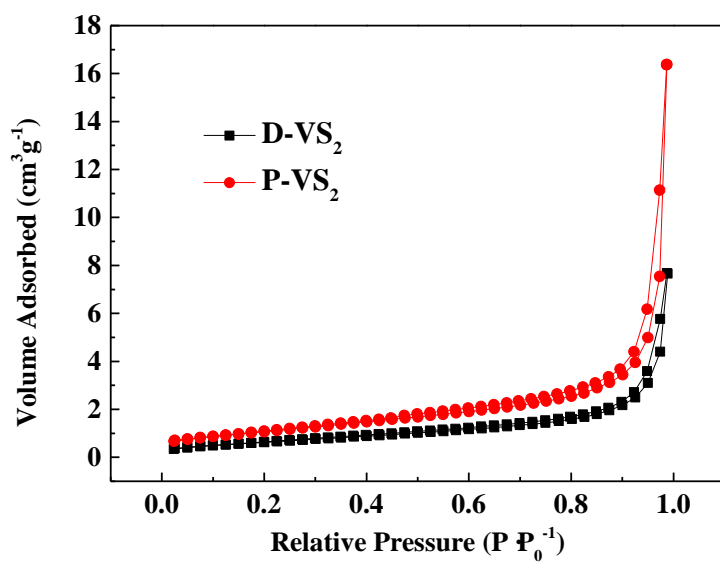

**Figure S5:** The Nitrogen adsorption–desorption isotherm of P-VS<sub>2</sub> and D-VS<sub>2</sub> electrode.

**Table S1:** The performance comparison of D-VS<sub>2</sub> with other metal dichalcogenides.

| Type                                         | Electrolyte                                       | Cycle Stability(h) | Specific capacity (mAh g <sup>-1</sup> ) | Ref.      |
|----------------------------------------------|---------------------------------------------------|--------------------|------------------------------------------|-----------|
| D- VS <sub>2</sub> nanosheet                 | ZnSO <sub>4</sub>                                 | 94% after 524h     | 262                                      | This work |
| VS <sub>2</sub> nanosheet                    | ZnSO <sub>4</sub>                                 | 98% after 109.5h   | 159.1                                    | 4         |
| VS <sub>2</sub> @SS nanosheet                | ZnSO <sub>4</sub>                                 | 90% after 336h     | 187                                      | 5         |
| E-MoS <sub>2</sub> nanosheet                 | ZnSO <sub>4</sub>                                 | 98.6% after 197.4h | 202.6                                    | 6         |
| MoS <sub>2-x</sub> nanosheets                | Zn(CF <sub>3</sub> SO <sub>3</sub> ) <sub>2</sub> | 87.8% after 191.2h | 138.6                                    | 7         |
| MoS <sub>2</sub> nanosheets                  | Zn(CF <sub>3</sub> SO <sub>3</sub> ) <sub>2</sub> | 98.1% after 95.2h  | 168                                      | 8         |
| MoS <sub>2</sub> -O nanosheets               | Zn(CF <sub>3</sub> SO <sub>3</sub> ) <sub>2</sub> | -                  | 232                                      | 9         |
| Bi <sub>2</sub> S <sub>3</sub> nanoparticles | ZnSO <sub>4</sub>                                 | 100% after 161h    | 161                                      | 10        |
| Na <sub>0.14</sub> TiS <sub>2</sub>          | Zn(CF <sub>3</sub> SO <sub>3</sub> ) <sub>2</sub> | 98% after 720h     | 120                                      | 11        |

- 1 J. Perdew, K. Burke and M. Ernzerhof, *Phys. Rev. Lett.*, 1996, **77**, 3865.
- 2 P. Blöchl, *Phys. Rev. B*, 1994, **50**, 17953.
- 3 G. Kresse and J. Furthmüller, *Comput. Mater. Sci.*, 1996, **6**, 15.
- 4 P. He, M. Y. Yan, G. B. Zhang, R. M. Sun, L. N. Chen, Q. Y. An and L. Q. Mai, *Adv. Energy Mater.*, 2017, **7**, 1601920
- 5 T. P. Jiao, Q. Yang, S. L. Wu, Z. F. Wang, D. Chen, D. Shen, B. Liu, J. Y. Cheng, H. F. Li, L. T. Ma, C. Y. Zhi and W. J. Zhang, *J. Mater. Chem. A*, 2019, **7**, 16330-16338.
- 6 H. F. Li, Q. Yang, F. N. Mo, G. J. Liang, Z. X. Liu, Z. J. Tang, L. T. Ma, J. Liu, Z. C. Shi and C. Y. Zhi, *Energy Storage Mater.*, 2019, **19**, 94.
- 7 W. W. Xu, C. L. Sun, K. N. Zhao, X. Cheng, S. Rawal, Y. Xu and Y. Wang, *Energy Storage Mater.*, 2019, **16**, 527.
- 8 J. P. Liu, P. T. Xu, J. M. Liang, H. B. Liu, W. C. Peng, Y. Li, F. B. Zhang and X. B. Fan, *Chem. Eng. J.*, 2020, **389**, 124405.
- 9 H. F. Liang, Z. Cao, F. W. Ming, W. L. Zhang, D. H. Anjum, Y. Cui, L. Cavallo and H. N. Alshareef, *Nano Lett.* 2019, **19**, 3199.
- 10 T. Xiong, Y. M. Wang, B. S. Yin, W. Shi, W. S. V. Lee and J. M. Xue, *Nano-Micro Lett.* 2020, **12**, 8.
- 11 W. Li, K. L. Wang, S. J. Cheng and Kai Jiang, *Adv. Energy Mater.* 2019, **9**, 1900993.
